# Supplementary material for: Autologous neutralizing antibody responses after antiretroviral therapy in acute and early HIV-1
Source: JCI journal article supplement (doi:10.1172/jci176673), 2024-04-23
Supplement: sd2 [file 2]

301 Moved Permanently

# Moved Permanently

The document has moved here.
